# Supplementary material
Source: PubMed Central journal article supplement (PMC1665023)
Supplement: tjp0558-0807-appendixa1.pdf [file tjp0558-0807-appendixa1.pdf]

## SUPPLEMENTARY MATERIAL

### **Figure S1. Na<sup>+</sup>-dependence and cation specificity of hCNT1-mediated uridine transport.**

Oocytes were injected with 10 nl of water without (control) or with 10 ng of RNA transcripts encoding hCNT1. The expression vector was pGEM-T. **A.** Inward current generated by perfusing an RNA-injected oocyte with 100  $\mu$ M uridine in Na<sup>+</sup>-containing transport medium (100 mM NaCl; pH 7.5). **B.** The same oocyte perfused with 100  $\mu$ M uridine in transport medium in which Na<sup>+</sup> was replaced by choline (100 mM ChCl; pH 7.5). **C** and **D** show the same experiment described in **A** and **B**, but with a control water-injected oocyte. No inward currents were generated. **E.** Current was measured in an RNA-injected oocyte in medium in which Na<sup>+</sup> was replaced by choline (100 mM ChCl) at pH 6.5. **F.** The same oocyte perfused with 100  $\mu$ M uridine in transport medium in which Na<sup>+</sup> was replaced by choline (100 mM ChCl) at pH 5.5.

### **Figure S2. hCNT1 steady-state current/voltage relationship.**

**A.** Time courses of transmembrane currents measured in the presence of 100  $\mu$ M external uridine in Na<sup>+</sup>-containing transport medium recorded in 10 mV increments from a holding potential ( $V_h$ ) of -50 mV to potentials ranging between -90 and +60 mV (*left trace*). Current responses are shown only at  $V_i = -90, -50, +10$  and +60 mV and the capacitive transients have been truncated to more clearly demonstrate the steady-state currents. Currents from the same oocyte were also recorded in the absence of uridine (*right trace*). **B.** Differences in membrane currents with and without uridine are shown at  $V_i = -90, -50, +10$  and +60 mV. **C.** The current/voltage (I/V) curve was generated by subtraction of steady-state currents in the presence and absence of uridine. The current produced by uridine at each potential ( $\pm$  SEM) was averaged from 4 - 5 different oocytes. The expression vector was pGEM-T.

**Figure S3. hCNT1 competition studies.** **A.** The current produced by perfusing an hCNT1-producing oocyte with 100  $\mu\text{M}$  uridine (*left trace*) in  $\text{Na}^+$ -containing transport medium was compared to the current generated when the same oocyte was simultaneously perfused with 100  $\mu\text{M}$  uridine plus 100  $\mu\text{M}$  thymidine (*right trace*). **B.** The same experiment was performed, but with 100  $\mu\text{M}$  uridine plus 100  $\mu\text{M}$  adenosine added to the transport medium. **C.** The nucleosides guanosine and uridine (each at a concentration of 100  $\mu\text{M}$ ) were added simultaneously to the oocyte. The expression vector was pGEM-T.

**Figure S4. Transport of zidovudine by hCNT1.** Oocytes were injected with 10 nl of water without (control) or with 10 ng of RNA transcripts encoding hCNT1. The expression vector was pGEM-HE. Current responses generated by 100  $\mu\text{M}$  or 1 mM zidovudine in  $\text{Na}^+$ -containing transport medium or 1 mM zidovudine in choline-containing medium are shown in **B**, **C** and **D**, respectively. The current produced by 100  $\mu\text{M}$  uridine in  $\text{Na}^+$ -containing medium is given for comparison in **A**. Zidovudine (1 mM) was also added to a control water-injected oocyte (**E** and **F**).

**Figure S5. Inhibition of hCNT1-mediated uridine influx by  $\beta$ -DFP-5M.** The uptake of 10  $\mu\text{M}$   $^{14}\text{C}$ -uridine in oocytes producing hCNT1 was measured either in the absence or presence of various concentrations of  $\beta$ -DFP-5M (0 - 10 mM) in  $\text{Na}^+$ -containing transport medium under standard initial rate conditions (1 min flux, 20  $^{\circ}\text{C}$ ). Mediated transport was calculated as uptake in RNA-injected oocytes *minus* uptake in water-injected oocytes. Each value is the mean  $\pm$  SEM of 10 - 12 oocytes and is expressed as a percentage of influx in the absence of  $\beta$ -DFP-5M. The expression vector was pGEM-HE.

**Figure S6. Inhibition of hCNT1-mediated Na<sup>+</sup> currents by phloridzin.** **A.** Inward current induced in an hCNT1-producing oocyte by 100 μM uridine in Na<sup>+</sup>-containing transport medium (*left current trace*) or after a 10 min incubation with 10 mM phloridzin (*right current trace*). **B.** Inward current induced in hCNT1-producing oocytes in response to 100 μM uridine was measured in Na<sup>+</sup>-containing transport medium before and after incubation with various concentrations of phloridzin (0 - 5 mM). The current produced after incubation with phloridzin was expressed as a percentage of the current produced in the same oocyte before incubation with inhibitor. Values are means (± SEM) of 5 - 7 different oocytes. **C.** Oocytes producing hCNT1 were incubated either in the absence or presence of various concentrations of phloridzin (0 - 5 mM) in Na<sup>+</sup>-containing medium, and influx of 10 μM <sup>14</sup>C-uridine was then measured under standard initial rate conditions (1 min flux, 20 °C). Mediated transport was calculated as uptake in RNA-injected oocytes *minus* uptake in water-injected oocytes. Each value is the mean ± SEM of 10 - 12 oocytes and is expressed as a percentage of uptake in the absence of phloridzin. The expression vector was pGEM-HE.

**Figure S7. Nucleoside analog hCNT1 steady-state kinetics.** hCNT1-mediated currents for 2'-deoxyuridine (**A**), 5-fluoro-2'-deoxyuridine (**B**), 5'-fluorouridine (**C**) and zidovudine (**D**) were measured in Na<sup>+</sup>-containing transport medium. Values are mean ± SEM of 5 - 6 different oocytes. The expression vector was pGEM-HE.

**Figure S8. hCNT1 presteady-state currents elicited by voltage pulses.** **A.** Voltage pulse protocol: the oocyte membrane was held at a holding potential ( $V_h$ ) of -50 mV and stepped to a range of test potentials ( $V_t$ ). Shown are  $V_t$  from -170 and +70 mV (20 mV increments). **B.** An hCNT1-producing oocyte in  $\text{Na}^+$ -containing transport medium. **C.** An hCNT1-producing oocyte in choline-containing medium. **D.** A control water-injected oocyte in  $\text{Na}^+$ -containing medium. The expression vector was pGEM-HE.

**Figure S9. Relationship between hCNT1 ON and OFF charge movements.** Correlation between charge movements in an hCNT1-producing oocyte in  $\text{Na}^+$ -containing transport medium obtained from the time integral of transient currents following command pulses to a range of  $V_t$  between -170 and +130 mV ( $Q_{\text{ON}}$ ) and charge movements following return to  $V_h$  (-50 mV) ( $Q_{\text{OFF}}$ ). Linear regression analysis of the data gave a slope ( $\pm$  SE) of  $0.90 \pm 0.03$  (*solid line*) compared to a reference slope of unity (*broken line*). The expression vector was pGEM-HE.

**Figure S10. Effect of uridine on hCNT1 presteady-state currents.** **A.** Representative presteady-state current recording of an hCNT1-producing oocyte in  $\text{Na}^+$ -containing transport medium in the presence of 100  $\mu\text{M}$  uridine. **B.** Maximal charge moved ( $Q_T$ ) as a function of uridine concentration. Charge movements with uridine present are shown as percentages of the charge movement in the absence of permeant (control). Each bar represents the average charge ( $\pm$  SEM) of 5 - 6 different oocytes. The expression vector was pGEM-HE.

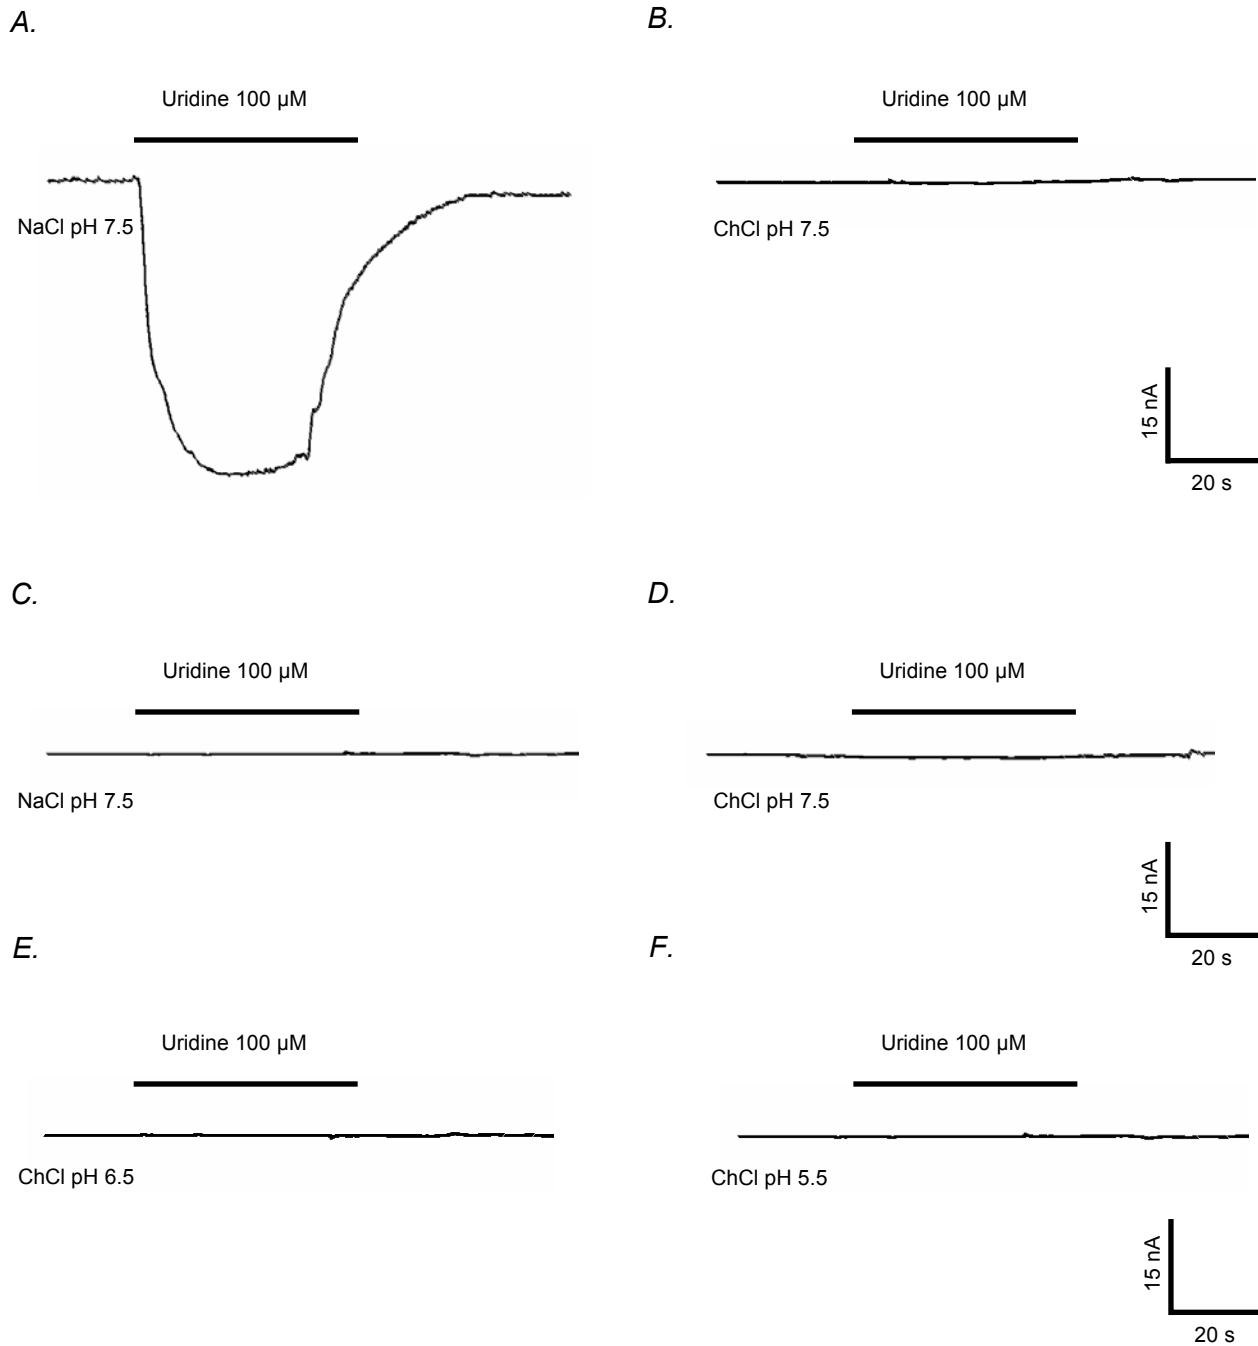

Figure S1

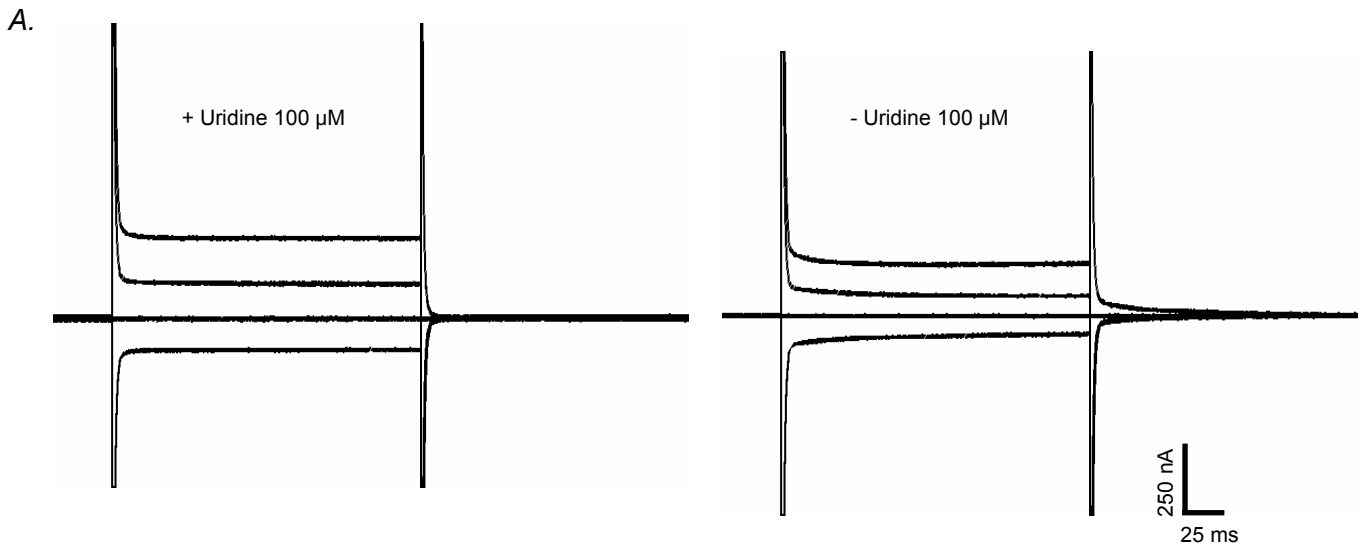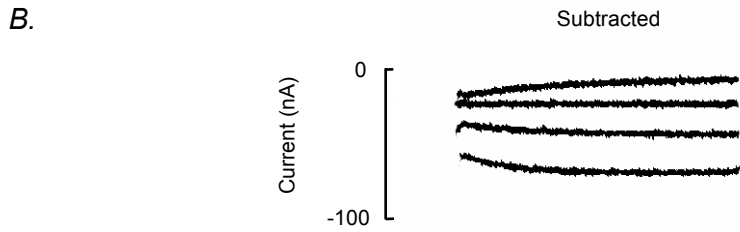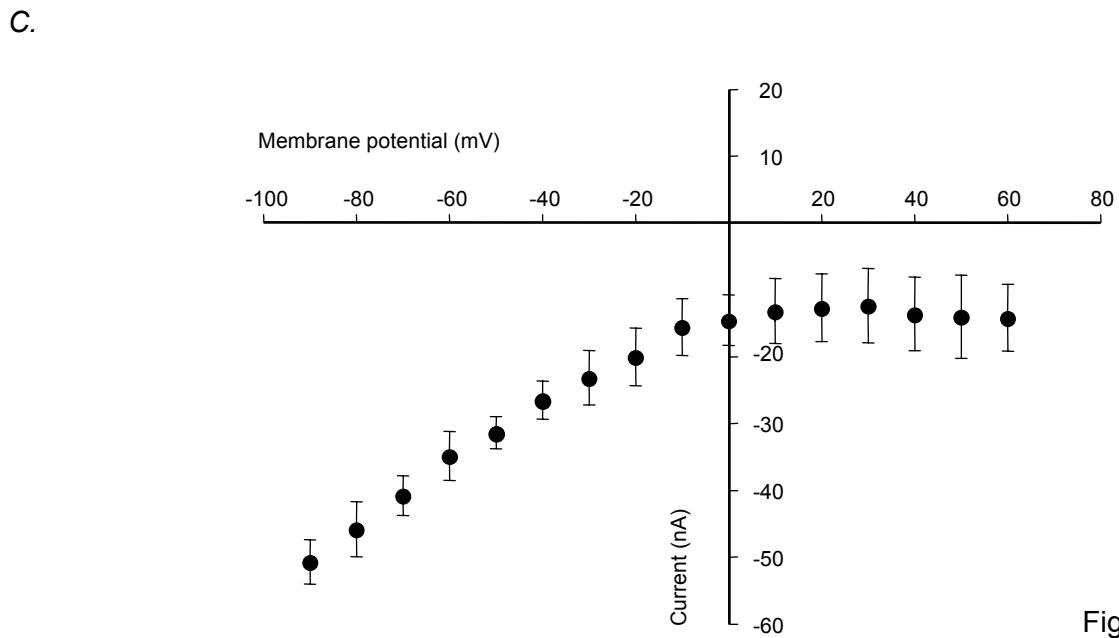

Figure S2

A.

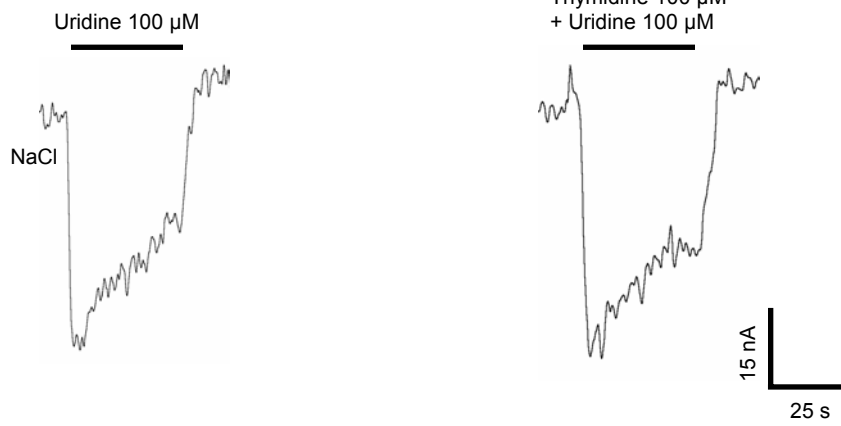

B.

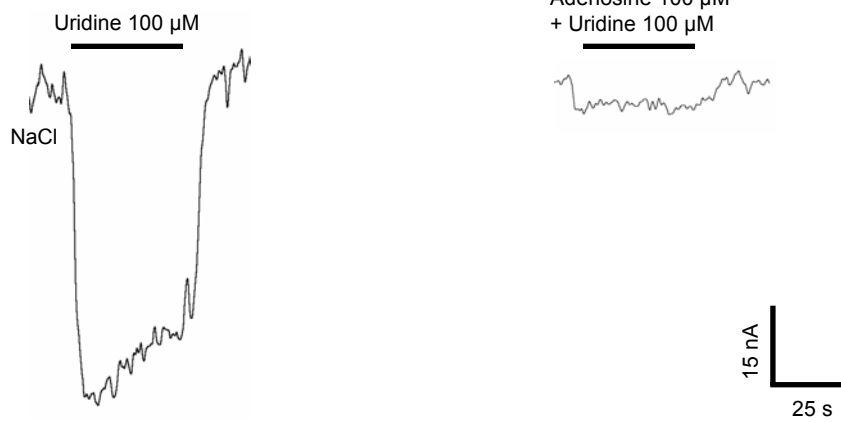

C.

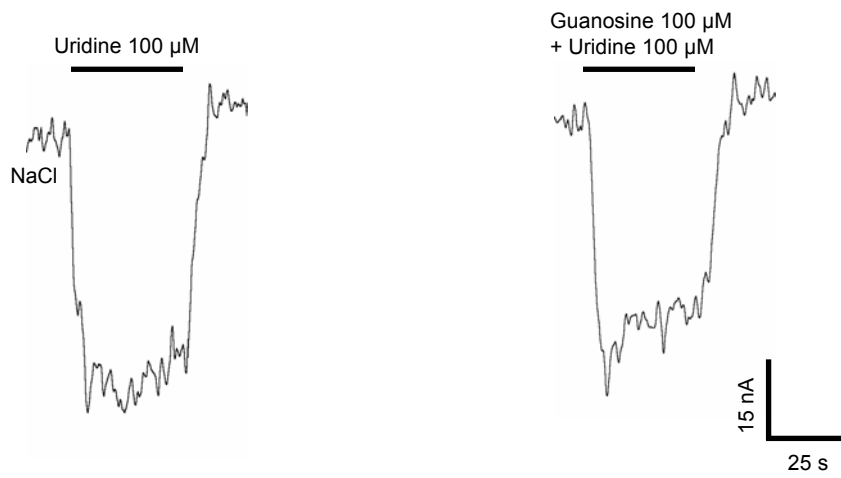

Figure S3

A.

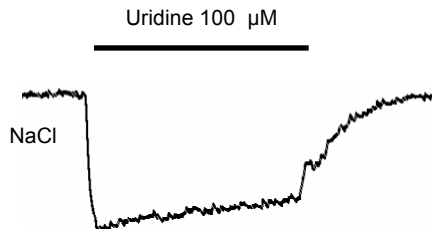

B.

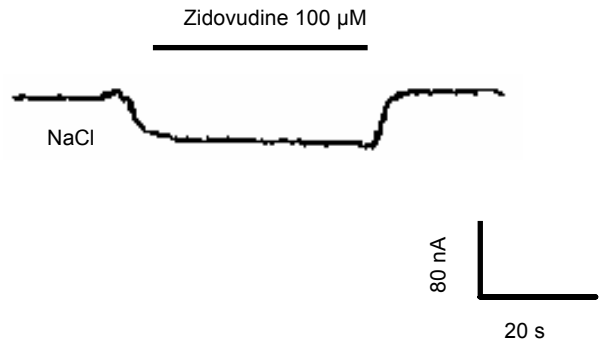

C.

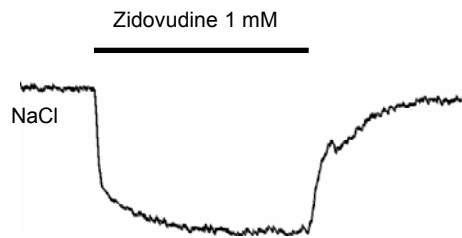

D.

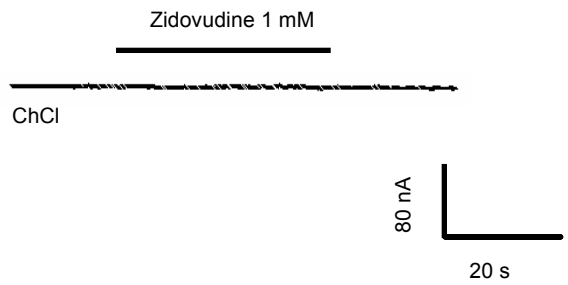

E.

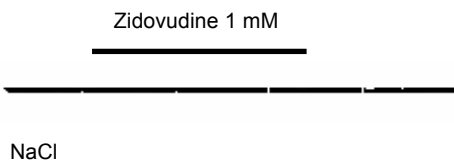

F.

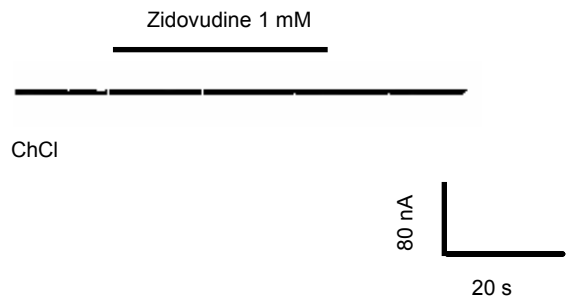

Figure S4



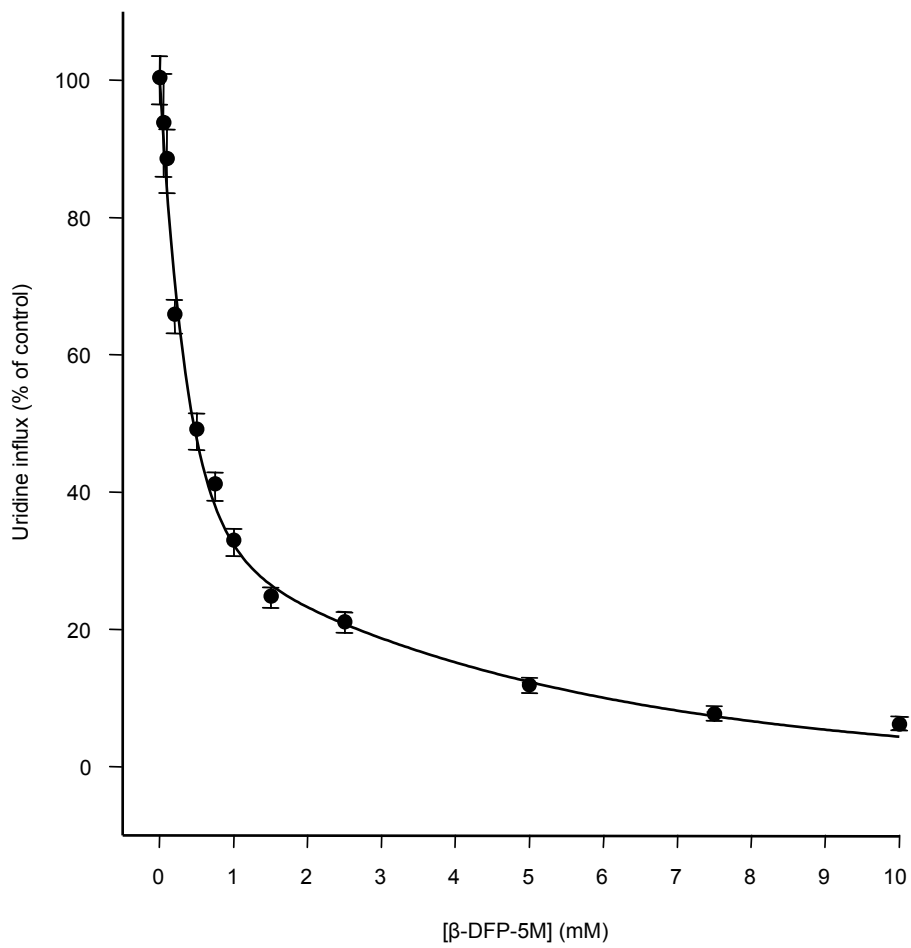

Figure S5

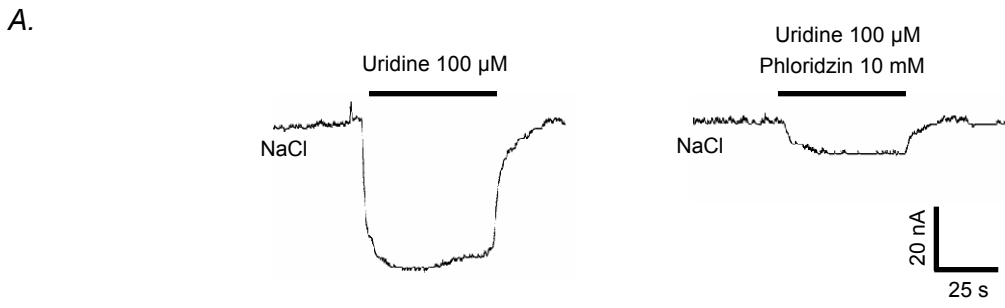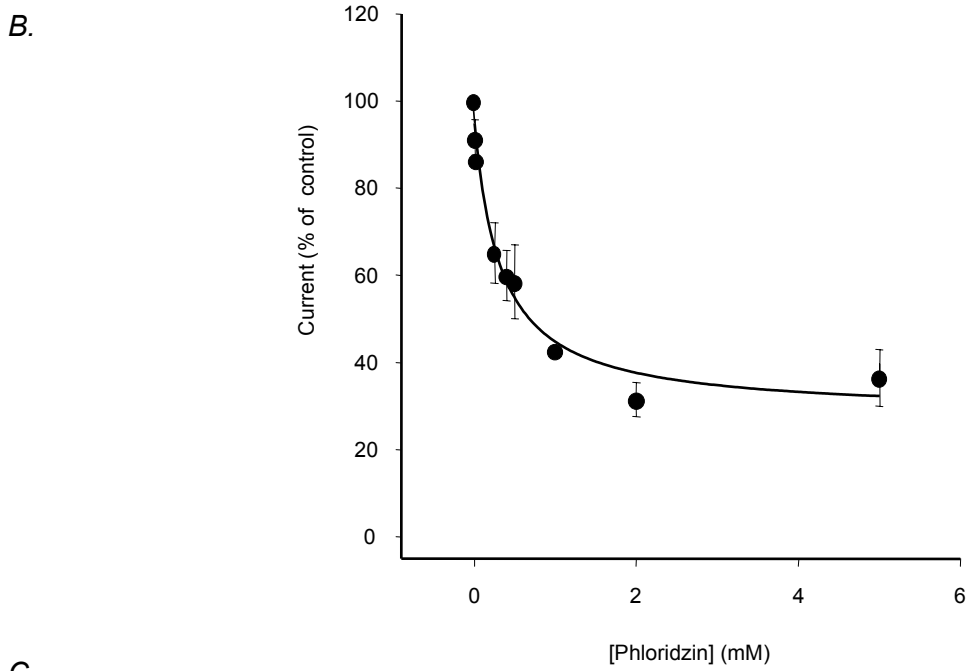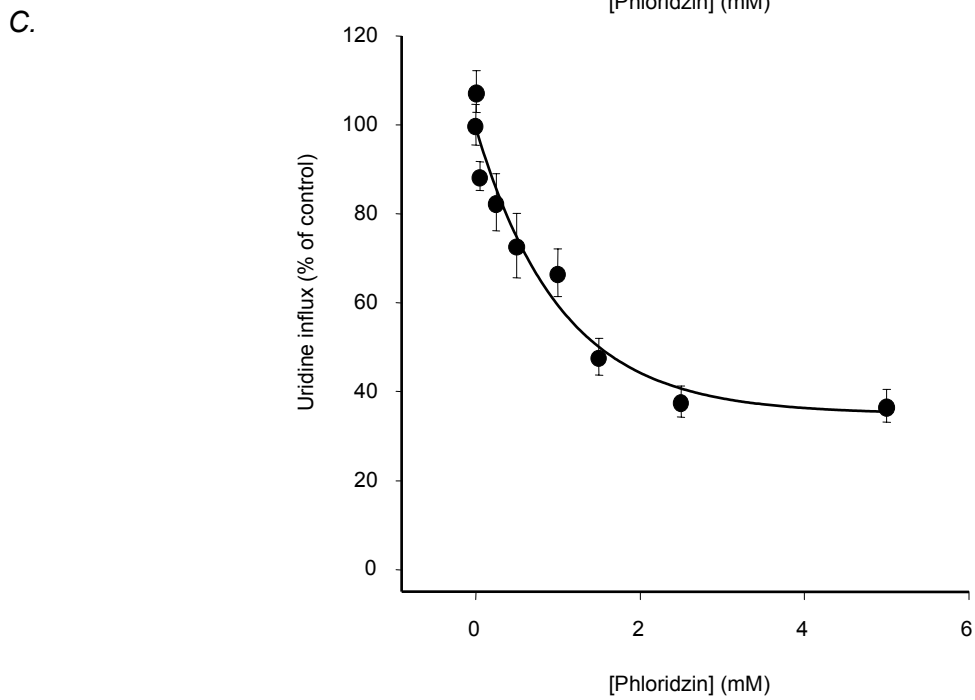

Figure S6

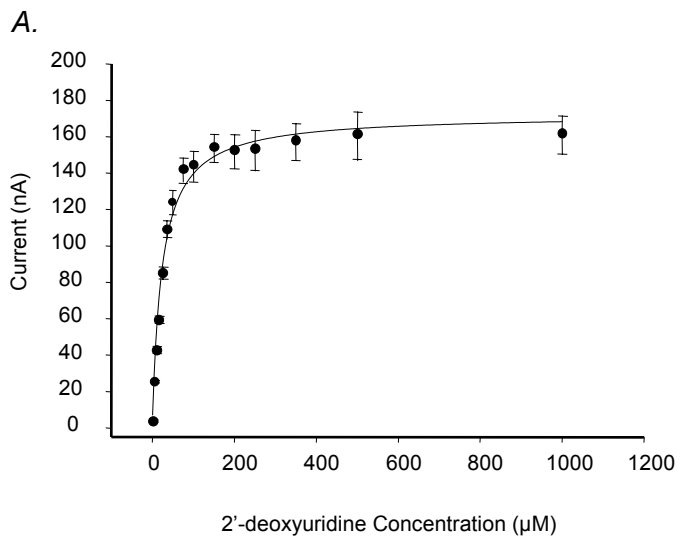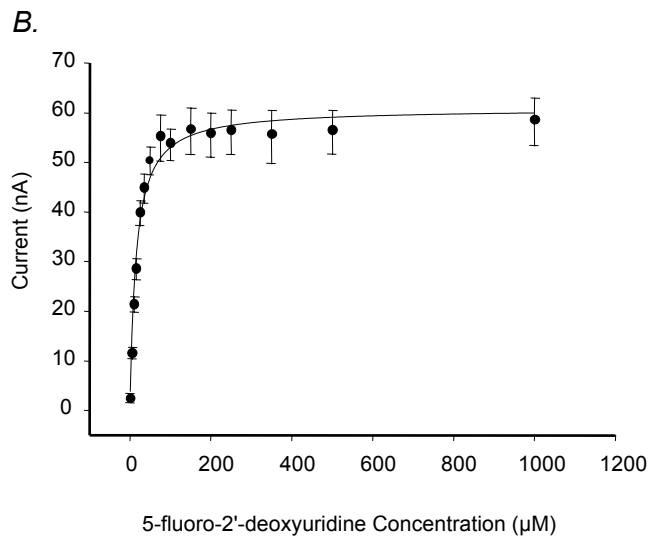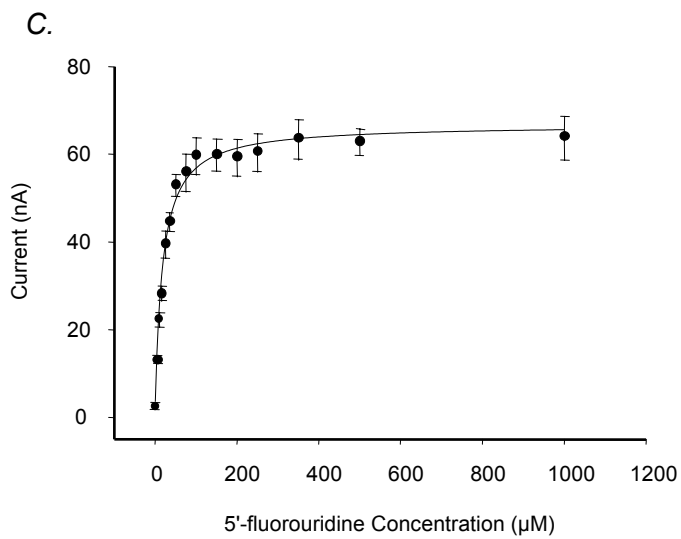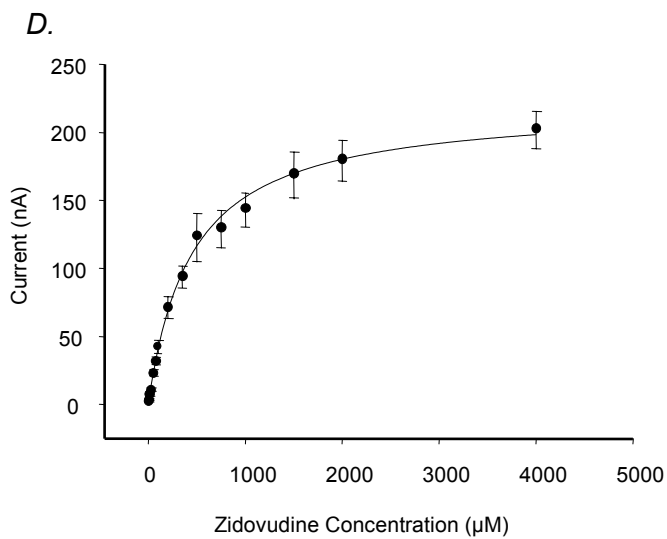

Figure S7

A.

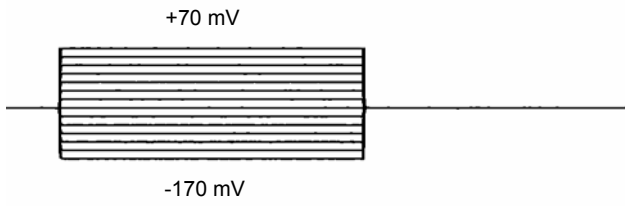

B.

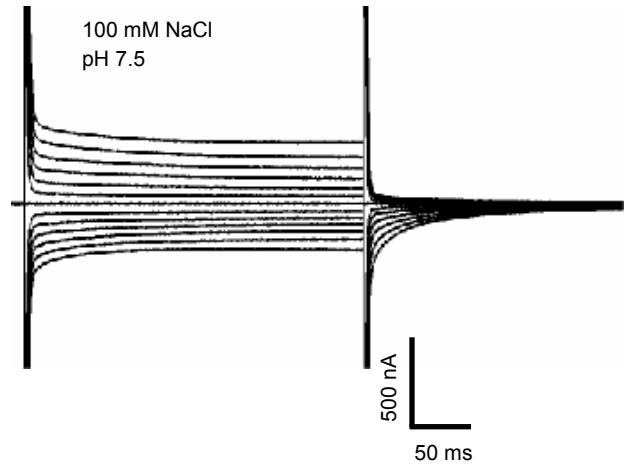

C.

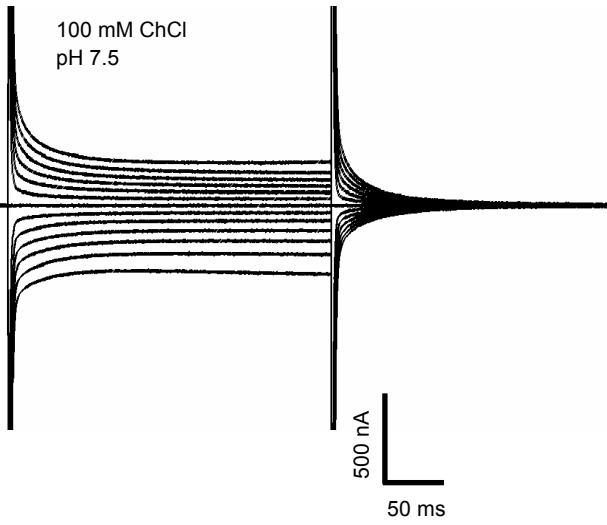

D.

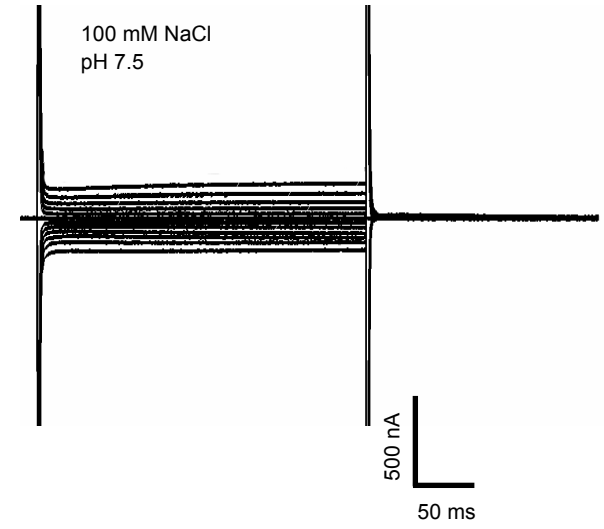

Figure S8

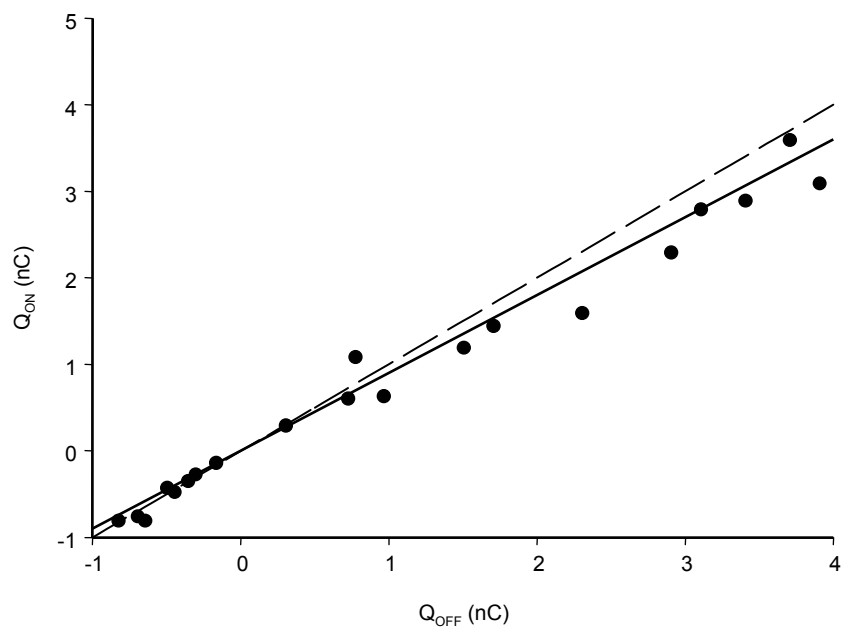

Figure S9

A.

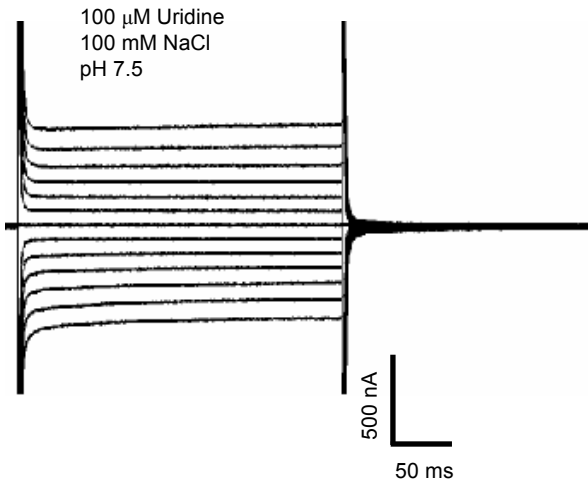

B.

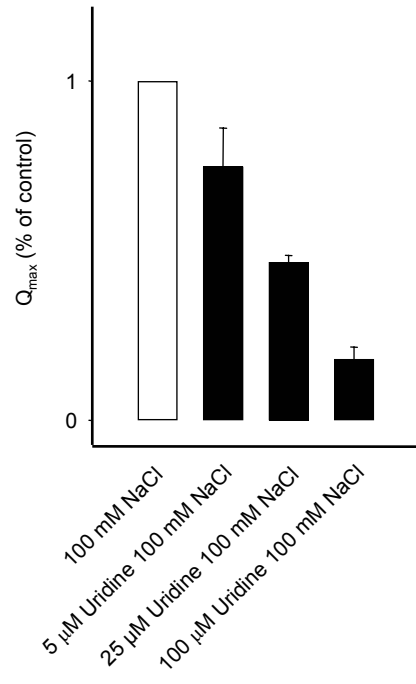

Figure S10
